# Supplementary figures and images for: Attention periodically samples competing stimuli during binocular rivalry
Source: eLife journal article supplement (doi:10.7554/elife.40868), 2018-12-03

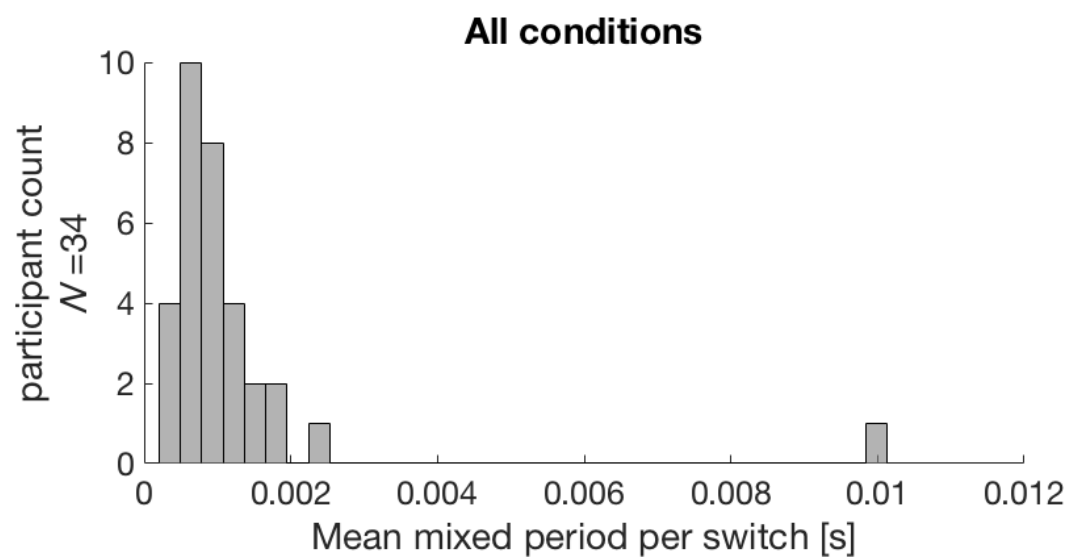

Supplement: supp [file elife_poa_e40868_Figure_2_figure_supplement_1.pdf › elife_poa_e40868_Figure_2_figure_supplement_1.pdf]

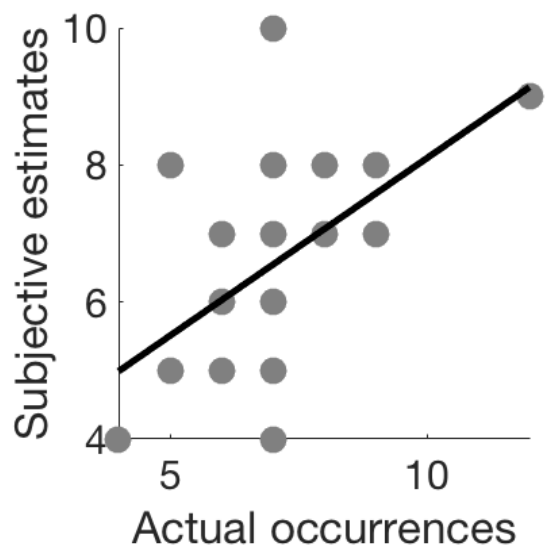

Supplement: supp [file elife_poa_e40868_Figure_2_figure_supplement_2.pdf › elife_poa_e40868_Figure_2_figure_supplement_2.pdf]

a)

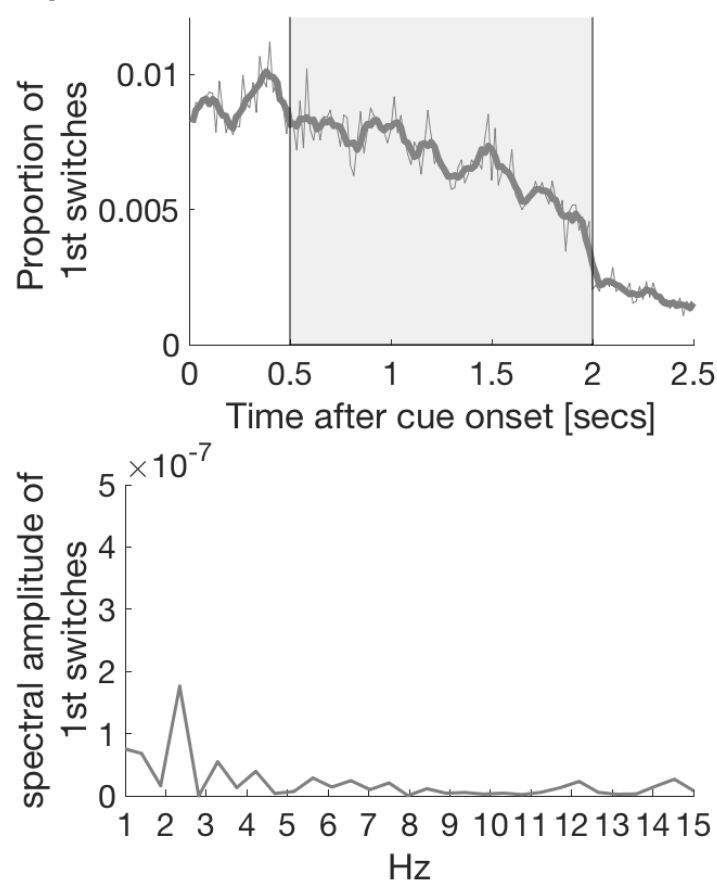

b)

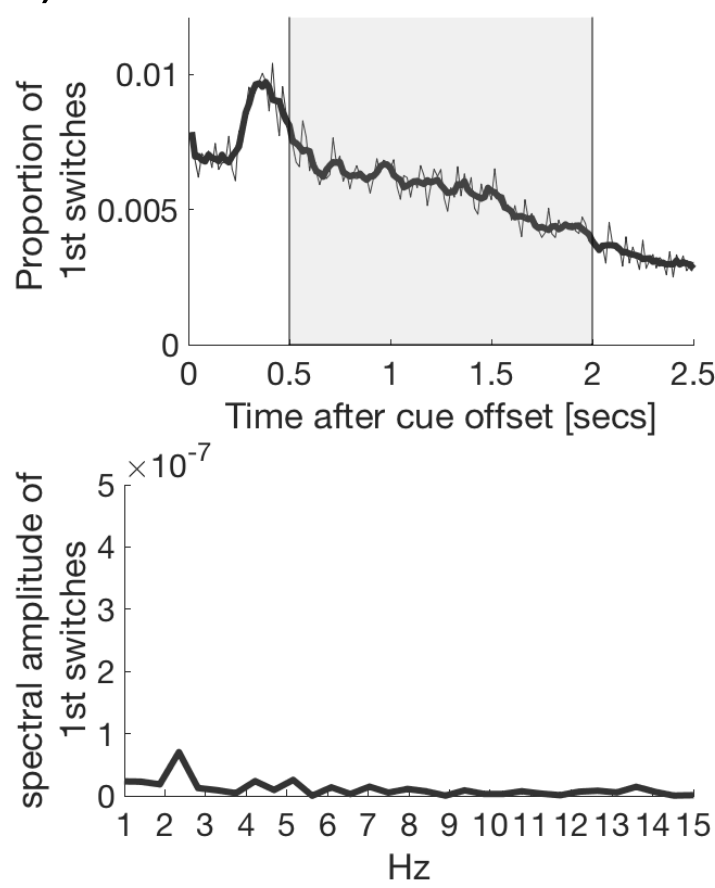

Supplement: supp [file elife_poa_e40868_Figure_3_figure_supplement_1.pdf › elife_poa_e40868_Figure_3_figure_supplement_1.pdf]

a)

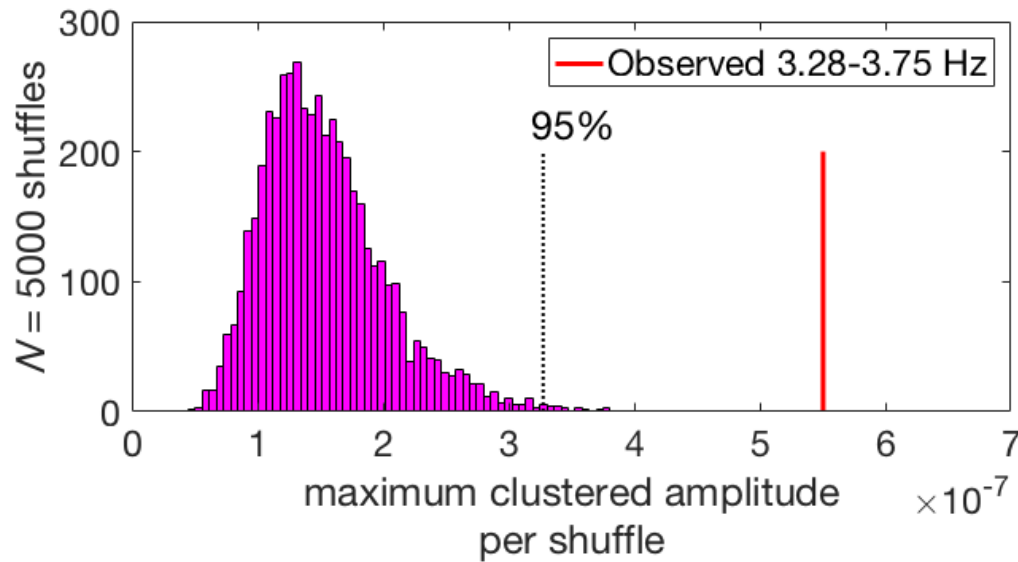

b)

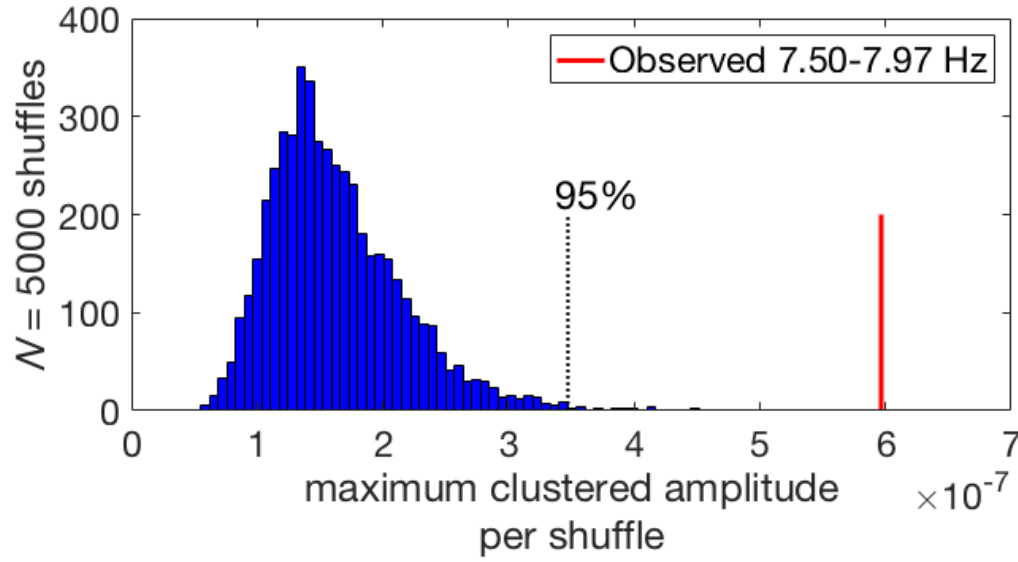

Supplement: supp [file elife_poa_e40868_Figure_3_figure_supplement_2.pdf › elife_poa_e40868_Figure_3_figure_supplement_2.pdf]

### a) Attended high-frequency

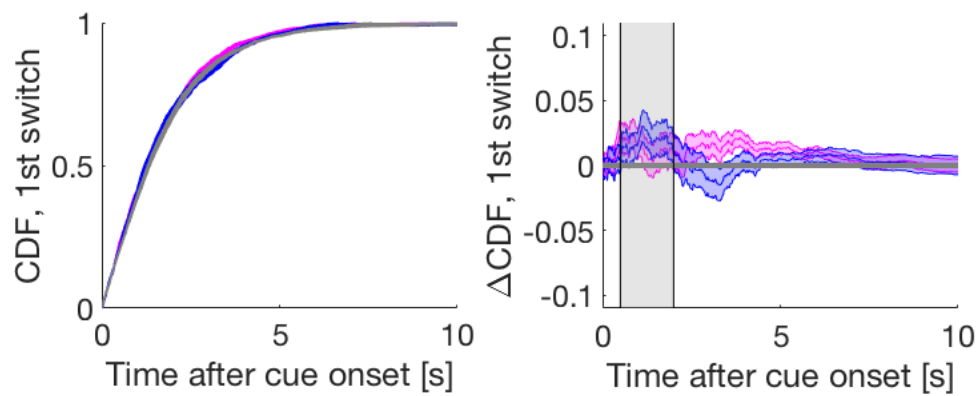

### b) Non-attended low-frequency

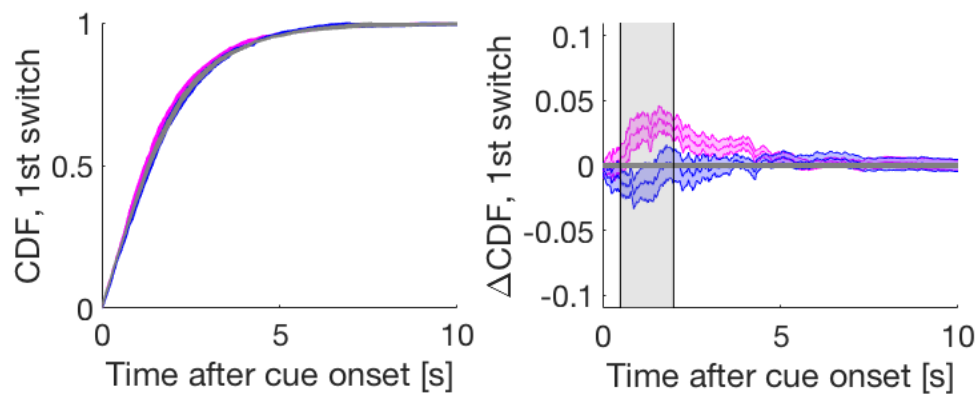

### c) Non-attended high-frequency

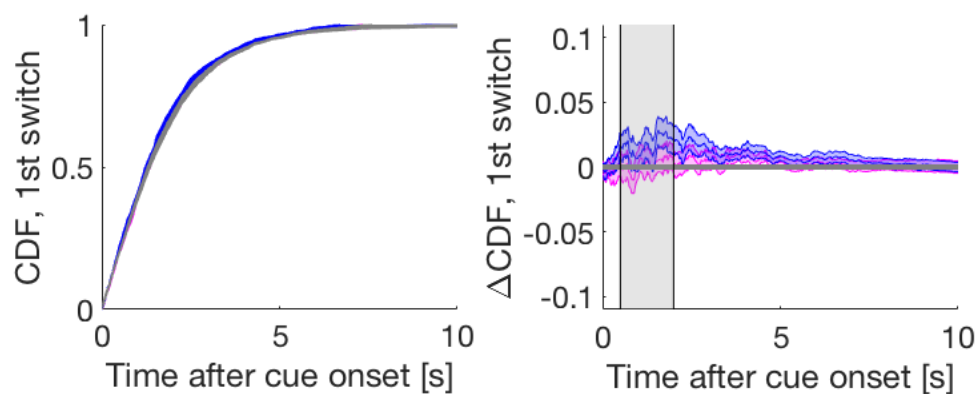

Supplement: supp [file elife_poa_e40868_Figure_3_figure_supplement_3.pdf › elife_poa_e40868_Figure_3_figure_supplement_3.pdf]

# a) 3.5 Hz ITPC

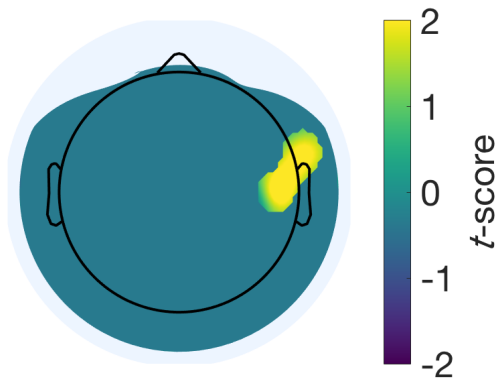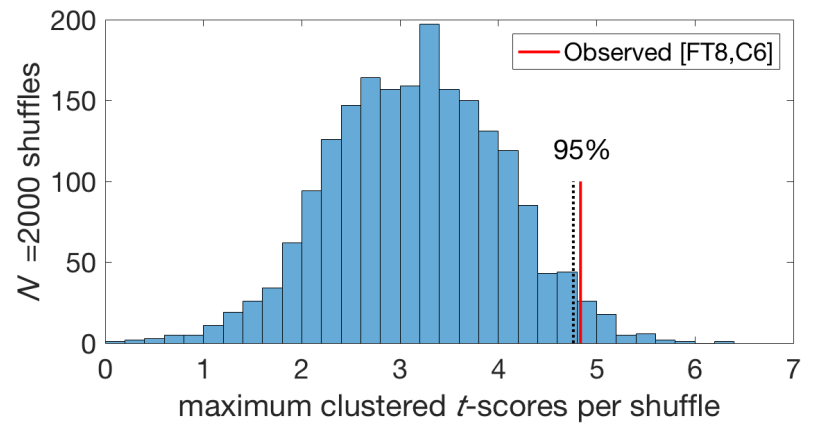

Supplement: supp [file elife_poa_e40868_Figure_4_figure_supplement_1.pdf › elife_poa_e40868_Figure_4_figure_supplement_1.pdf]

## a) 8 Hz ITPC

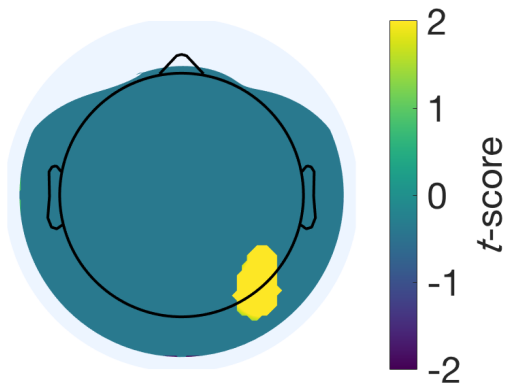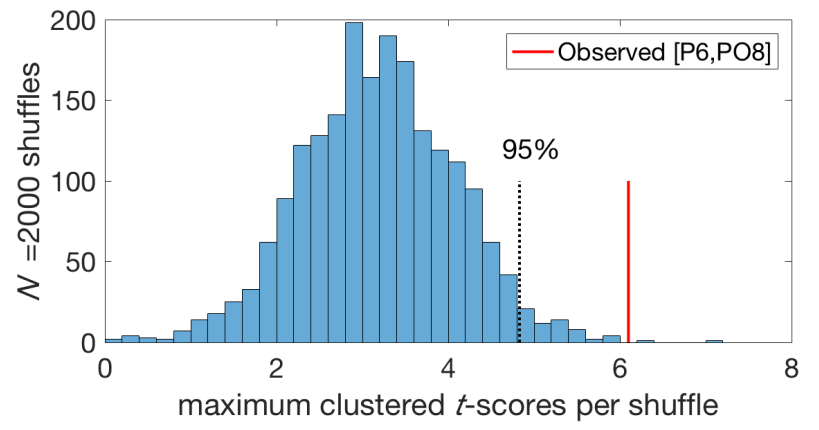

Supplement: supp [file elife_poa_e40868_Figure_5_figure_supplement_1.pdf › elife_poa_e40868_Figure_5_figure_supplement_1.pdf]
